# Supplementary material
Source: Springer Nature journal article supplement (https://www.springermedizin.de/resource/supplementary/12967_2012_1199_MOESM1_ESM.pdf/9573306)

**Proportion Alive**

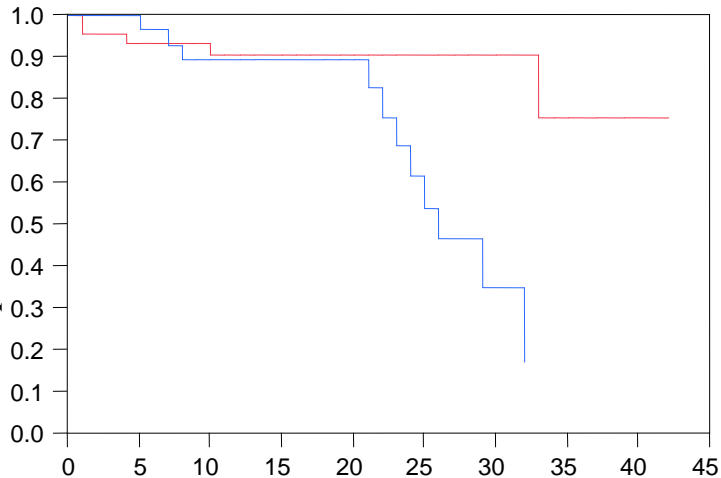

**Months**

Best —  
Non Best —

Supplement: MOESM1 [file 9573306]
